# Supplementary material
Source: MDPI journal article supplement (https://www.mdpi.com/2076-3271/7/9/94)
Supplement: s1 [file s1]

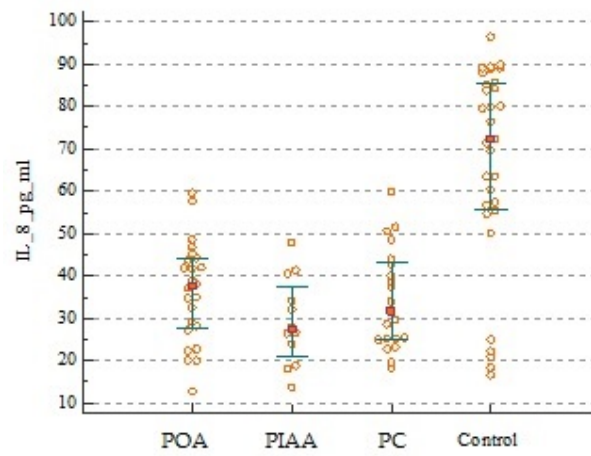

Figure S1. Distribution of the serum IL-8 level in patients with different origin of IAI before surgical intervention.

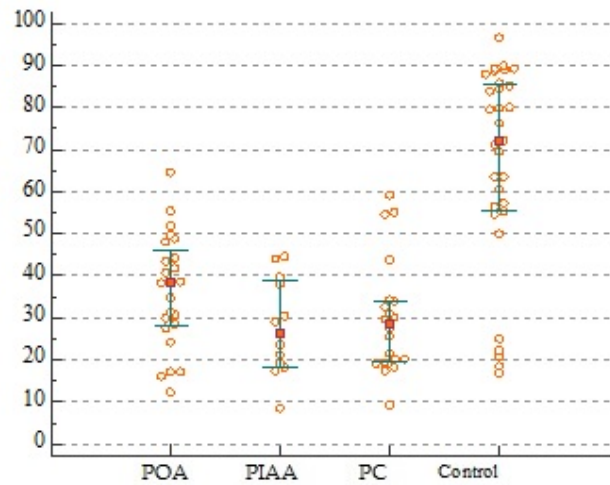

Figure S2 Distribution of the serum IL-8 level in patients with different origin of IAI on the 2<sup>nd</sup> - 3<sup>rd</sup> days of postsurgical intervention.

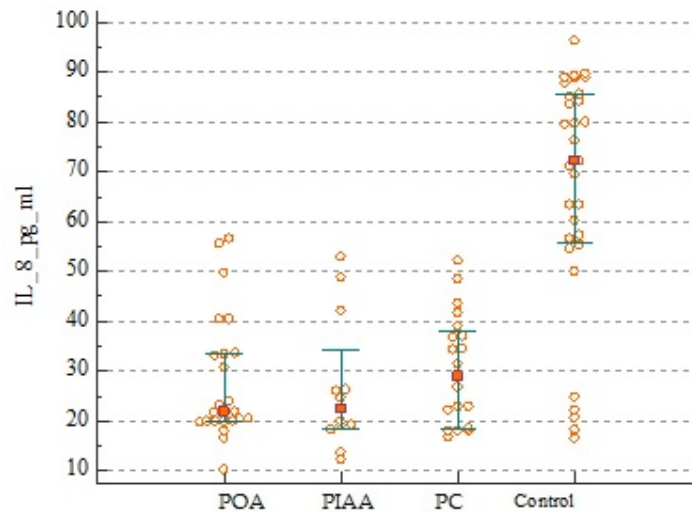

Figure S3 Distribution of the serum IL-8 level in patients with different origin of IAI on the 5<sup>th</sup> – 7<sup>th</sup> days of postsurgical intervention.

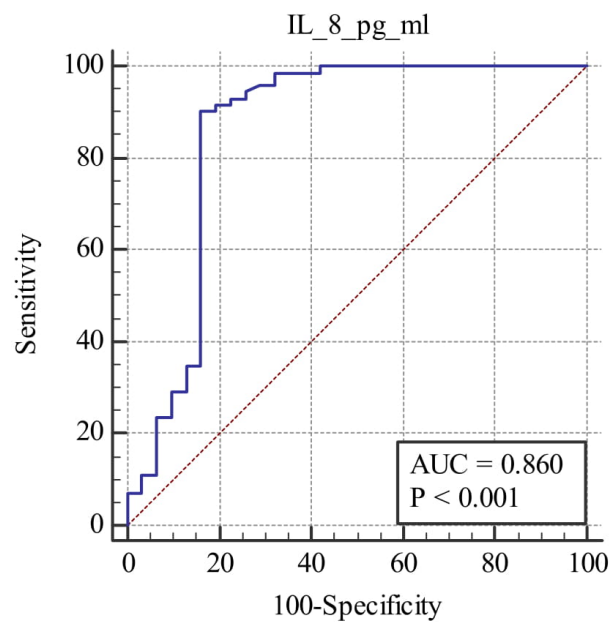

Figure S4. Results of ROC analysis for Postoperative Abscesses

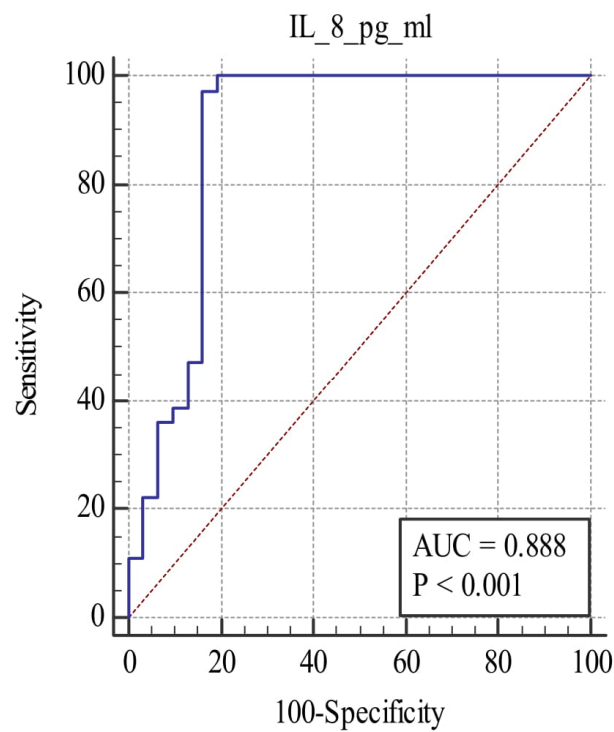

Figure S5. Results of ROC analysis for Postoperative Abscesses

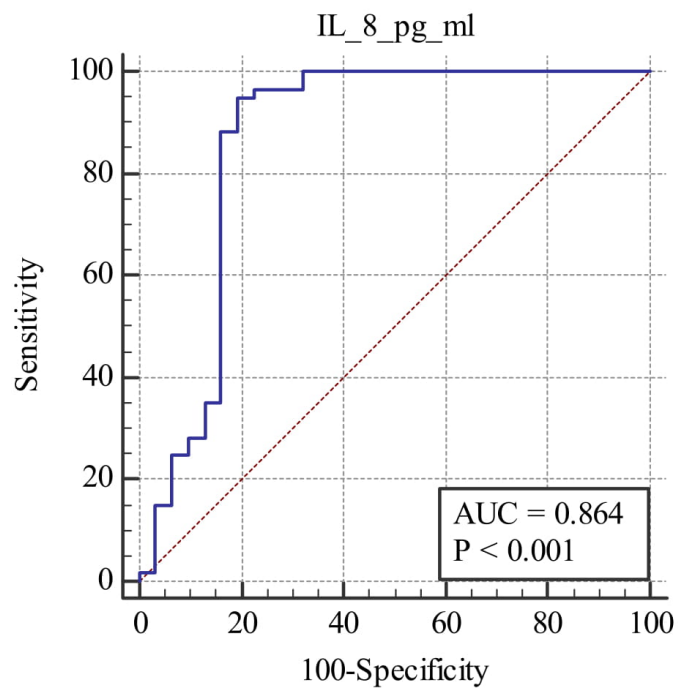

Figure S6. Results of ROC analysis for Primary Intra-Abdominal Abscesses

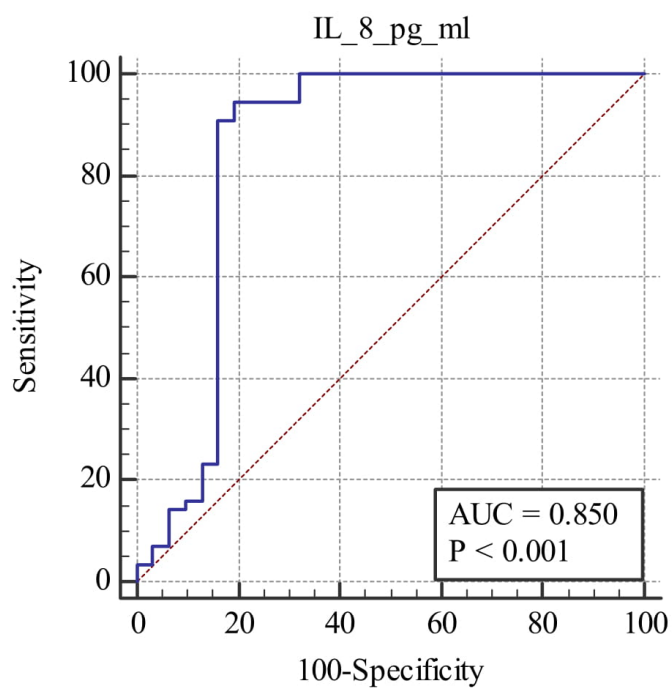

Figure S7. Results of ROC analysis for Peritoneal collection

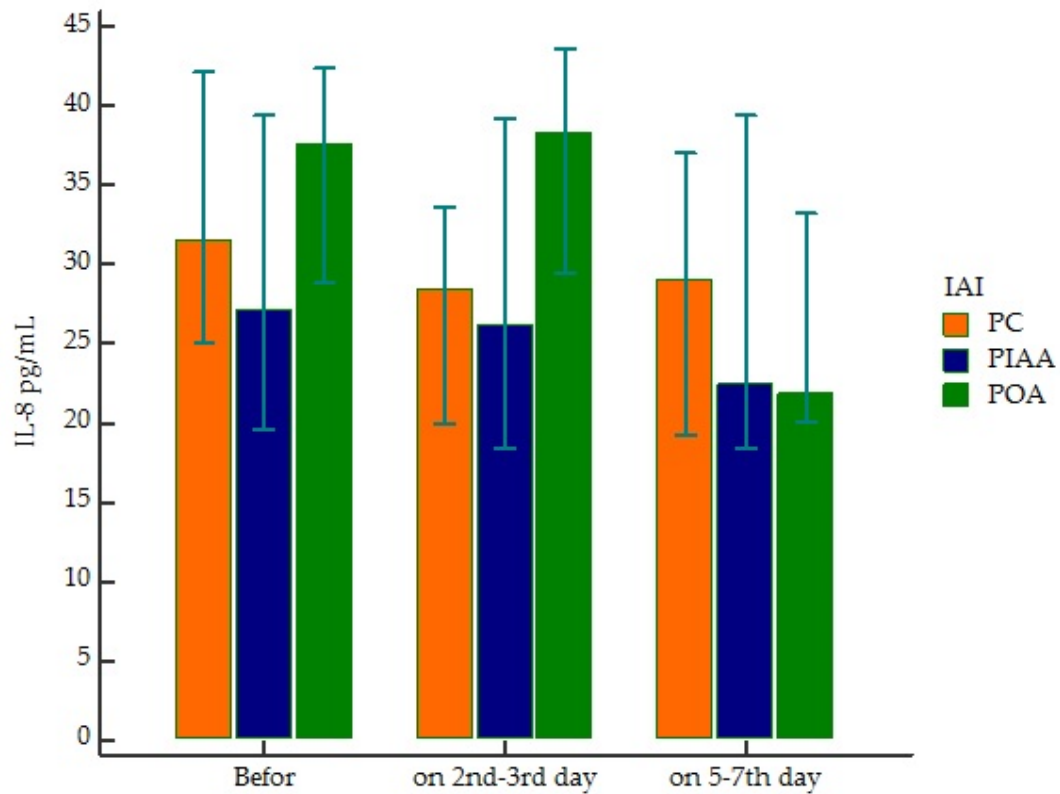

Figure S8. Result of two-way ANOVA test

Table S1 Two-way ANOVA: for serum IL-8 in patients with different origin of IAI

|                                               |                  |         |            |                         |                     |       |
|-----------------------------------------------|------------------|---------|------------|-------------------------|---------------------|-------|
| Dependent                                     | IL_8_pg_mL       |         |            |                         |                     |       |
| Sample size                                   | 168              |         |            |                         |                     |       |
| Levene's test for equality of error variances |                  |         |            |                         |                     |       |
| F                                             | DF 1             |         | DF 2       |                         | P                   |       |
| 0,1916                                        | 8                |         | 159        |                         | 0,992               |       |
| Tests of Between-Subjects Effects             |                  |         |            |                         |                     |       |
| Source                                        | Sum of Squares   |         | DF         | Mean Square             | F                   | P     |
| Time                                          | 638,242          |         | 2          | 319,121                 | 2,075               | 0,129 |
| Type_of_IAI                                   | 733,164          |         | 2          | 366,582                 | 2,383               | 0,096 |
| Time*Type_of_IAI                              | 479,434          |         | 4          | 119,858                 | 0,779               | 0,540 |
| Residual                                      | 24458,110        |         | 159        | 153,825                 |                     |       |
| 1. Time                                       |                  |         |            |                         |                     |       |
| Estimated Marginal Means                      |                  |         |            |                         |                     |       |
| Time                                          | n                | Mean    | Std. Error | 95% Confidence interval |                     |       |
| Befor                                         | 56               | 33,2967 | 1,7295     | 29,8810 to 36,7124      |                     |       |
| on 2nd-3rd day                                | 56               | 31,3547 | 1,7295     | 27,9390 to 34,7703      |                     |       |
| on 5-7th day                                  | 56               | 28,3524 | 1,7295     | 24,9368 to 31,7681      |                     |       |
| Pairwise comparisons                          |                  |         |            |                         |                     |       |
| Factors                                       | Mean difference  |         | Std. Error | P <sup>a</sup>          | 95% CI <sup>a</sup> |       |
| Befor                                         | - on 2nd-3rd day | 1,9421  | 2,4458     | 1,0000                  | -3,9758 to 7,8599   |       |
|                                               | - on 5-7th day   | 4,9443  | 2,4458     | 0,1347                  | -0,9736 to 10,8621  |       |
| on 2nd-3rd day                                | - Befor          | -1,9421 | 2,4458     | 1,0000                  | -7,8599 to 3,9758   |       |
|                                               | - on 5-7th day   | 3,0022  | 2,4458     | 0,6644                  | -2,9156 to 8,9201   |       |

|              |   |                |         |        |        |                    |
|--------------|---|----------------|---------|--------|--------|--------------------|
| on 5-7th day | - | Befor          | -4,9443 | 2,4458 | 0,1347 | -10,8621 to 0,9736 |
|              | - | on 2nd-3rd day | -3,0022 | 2,4458 | 0,6644 | -8,9201 to 2,9156  |

<sup>a</sup> Bonferroni corrected

## 2. Type\_of\_IAI

### Estimated Marginal Means

| Type_of_IAI | n  | Mean    | Std. Error | 95% Confidence interval |
|-------------|----|---------|------------|-------------------------|
| PC          | 60 | 31,5255 | 1,6012     | 28,3632 to 34,6878      |
| PIAA        | 36 | 27,9769 | 2,0671     | 23,8944 to 32,0595      |
| POA         | 72 | 33,5014 | 1,4617     | 30,6146 to 36,3882      |

### Pairwise comparisons

| Factors    | Mean difference | Std. Error | P <sup>a</sup> | 95% CI <sup>a</sup> |
|------------|-----------------|------------|----------------|---------------------|
| PC - PIAA  | 3,5486          | 2,6147     | 0,5300         | -2,7779 to 9,8750   |
| PC - POA   | -1,9759         | 2,1680     | 1,0000         | -7,2215 to 3,2697   |
| PIAA - PC  | -3,5486         | 2,6147     | 0,5300         | -9,8750 to 2,7779   |
| PIAA - POA | -5,5244         | 2,5317     | 0,0917         | -11,6500 to 0,6011  |
| POA - PC   | 1,9759          | 2,1680     | 1,0000         | -3,2697 to 7,2215   |
| POA - PIAA | 5,5244          | 2,5317     | 0,0917         | -0,6011 to 11,6500  |

<sup>a</sup> Bonferroni corrected

## 3. Time\*Type\_of\_IAI

### Estimated Marginal Means

| Time           | Type_of_IAI | n  | Mean    | Std. Error | 95% Confidence interval |
|----------------|-------------|----|---------|------------|-------------------------|
| Befor          | PC          | 20 | 34,4635 | 2,7733     | 28,9862 to 39,9408      |
|                | PIAA        | 12 | 29,2267 | 3,5803     | 22,1555 to 36,2978      |
|                | POA         | 24 | 36,2000 | 2,5317     | 31,2000 to 41,2000      |
| on 2nd-3rd day | PC          | 20 | 30,0290 | 2,7733     | 24,5517 to 35,5063      |
|                | PIAA        | 12 | 27,7417 | 3,5803     | 20,6705 to 34,8128      |
|                | POA         | 24 | 36,2933 | 2,5317     | 31,2933 to 41,2934      |
| on 5-7th day   | PC          | 20 | 30,0840 | 2,7733     | 24,6067 to 35,5613      |
|                | PIAA        | 12 | 26,9625 | 3,5803     | 19,8914 to 34,0336      |
|                | POA         | 24 | 28,0108 | 2,5317     | 23,0108 to 33,0109      |

### Summary statistics for dependent variable

| Variable   | Mean    | Standard deviation |
|------------|---------|--------------------|
| IL_8_pg_mL | 31,6119 | 12,6129            |
